# Supplementary material
Source: Research Square preprint supplement (doi:10.21203/rs.3.rs-9087283/v1)
Supplement: Supplementary file 2 [file a442c4b5f6b0afdd49bc9310.xlsx]

## Sheet: Sequence Characteristics
			Horizontal Gene Transfer Between Fungi and Myxozoa: An Evolutionary Perspective
			Amr G. A. Ibrahim; Edson A. Adriano
			Supplementary Table S1 - Shows the several candidate genes present across multiple myxozoan species.
Gene	Species	Length (bp)	Percent Identity (%)	Coverage (%)	E-value	GC Content (%)	Conserved Domains
CAZyme (GH family)	Ceratomyxa sp.	1926	77.42	87.38	1.07e-128	51.55	Glycoside hydrolase family
CAZyme (GH family)	Ceratonova shasta	921	70.57	85.76	2.41e-137	51.62	Glycoside hydrolase family
CAZyme (GH family)	Ellipsomyxa sp.	2487	75.86	85.73	6.31e-123	57.02	Glycoside hydrolase family
CAZyme (GH family)	Henneguya salminicola	1185	70.85	87.38	3.77e-81	50.4	Glycoside hydrolase family
CAZyme (GH family)	Myxobolus cerebralis	1547	69.15	91.82	1.03e-90	42.75	Glycoside hydrolase family
CAZyme (GH family)	Myxobolus squamalis	1499	72.82	90.93	3.04e-129	45.19	Glycoside hydrolase family
CAZyme (GH family)	Sphaeromyxa zaharoni	2390	79.42	91.07	1.01e-136	52.88	Glycoside hydrolase family
6-phosphofructokinase	Ceratomyxa sp.	1640	69.6	97.34	2.73e-147	54.93	PFK domain, ATP-binding domain
6-phosphofructokinase	Ceratonova shasta	1576	69.07	88	7.90e-75	52.93	PFK domain, ATP-binding domain
6-phosphofructokinase	Ellipsomyxa sp.	2251	74.2	85.45	1.17e-141	46.14	PFK domain, ATP-binding domain
6-phosphofructokinase	Henneguya salminicola	2211	72.24	91.76	2.13e-105	44.96	PFK domain, ATP-binding domain
6-phosphofructokinase	Myxobolus cerebralis	1502	77.91	90.85	3.05e-90	56.83	PFK domain, ATP-binding domain
6-phosphofructokinase	Myxobolus squamalis	1615	72.39	92.42	8.25e-103	57.38	PFK domain, ATP-binding domain
6-phosphofructokinase	Sphaeromyxa zaharoni	1519	76.9	92.02	2.11e-109	57.44	PFK domain, ATP-binding domain
Hexokinase	Ceratomyxa sp.	987	74.71	86.83	6.03e-131	43.19	Hexokinase domain, Sugar binding domain
Hexokinase	Ceratonova shasta	1320	77.16	87.58	2.80e-51	55.05	Hexokinase domain, Sugar binding domain
Hexokinase	Ellipsomyxa sp.	1392	76.51	95.27	2.54e-111	56.82	Hexokinase domain, Sugar binding domain
Hexokinase	Henneguya salminicola	1817	70.14	96.22	4.68e-113	47.29	Hexokinase domain, Sugar binding domain
Hexokinase	Myxobolus cerebralis	1871	72.87	93.69	2.56e-117	51.46	Hexokinase domain, Sugar binding domain
Hexokinase	Myxobolus squamalis	1525	78.39	91.14	1.10e-62	53.41	Hexokinase domain, Sugar binding domain
Hexokinase	Sphaeromyxa zaharoni	1828	74.91	95.02	4.17e-100	50.36	Hexokinase domain, Sugar binding domain
ABC transporter	Ceratomyxa sp.	1838	70.09	90.71	6.73e-71	56.33	ABC transporter domain, ATP-binding cassette
ABC transporter	Ceratonova shasta	2064	72.26	91.61	1.75e-141	45.99	ABC transporter domain, ATP-binding cassette
ABC transporter	Ellipsomyxa sp.	1548	74.68	87.64	5.18e-145	51.58	ABC transporter domain, ATP-binding cassette
ABC transporter	Henneguya salminicola	2066	70.63	97.09	1.54e-131	52.13	ABC transporter domain, ATP-binding cassette
ABC transporter	Myxobolus cerebralis	1445	73.78	87.84	2.23e-92	56.13	ABC transporter domain, ATP-binding cassette
ABC transporter	Myxobolus squamalis	2463	77.54	96.65	1.58e-82	43.76	ABC transporter domain, ATP-binding cassette
ABC transporter	Sphaeromyxa zaharoni	2200	75.83	85.01	5.53e-86	46.88	ABC transporter domain, ATP-binding cassette
Aquaporin	Ceratomyxa sp.	1509	74.36	90.43	6.15e-73	43.92	Major intrinsic protein (MIP) domain
Aquaporin	Ceratonova shasta	1483	71.51	87.19	1.33e-72	50.93	Major intrinsic protein (MIP) domain
Aquaporin	Ellipsomyxa sp.	1936	69.59	88.3	2.05e-75	53.14	Major intrinsic protein (MIP) domain
Aquaporin	Henneguya salminicola	2210	72.12	88.7	2.05e-54	51.75	Major intrinsic protein (MIP) domain
Aquaporin	Myxobolus cerebralis	1441	73.3	85.43	3.11e-85	52.15	Major intrinsic protein (MIP) domain
Aquaporin	Myxobolus squamalis	2461	70.45	91.36	2.72e-149	45.87	Major intrinsic protein (MIP) domain
Aquaporin	Sphaeromyxa zaharoni	1635	69.77	89.81	6.08e-75	54.85	Major intrinsic protein (MIP) domain
Serpin	Ceratomyxa sp.	1683	79.42	90.18	2.27e-132	54.77	Serpin domain, Reactive center loop
Serpin	Ceratonova shasta	2024	72.33	87.42	8.37e-55	51.45	Serpin domain, Reactive center loop
Serpin	Ellipsomyxa sp.	1754	71.26	94.24	1.12e-131	47.58	Serpin domain, Reactive center loop
Serpin	Henneguya salminicola	1288	76.29	90.03	2.12e-144	44.2	Serpin domain, Reactive center loop
Serpin	Myxobolus cerebralis	1272	71.14	92.04	2.64e-120	45.66	Serpin domain, Reactive center loop
Serpin	Myxobolus squamalis	943	77.64	92.22	1.08e-103	45.87	Serpin domain, Reactive center loop
Serpin	Sphaeromyxa zaharoni	2127	79.23	92.26	5.45e-139	45.02	Serpin domain, Reactive center loop
Peroxiredoxin	Ceratomyxa sp.	2056	72.64	94.44	1.95e-140	56.19	Peroxiredoxin domain, Thioredoxin-like fold
Peroxiredoxin	Ceratonova shasta	1943	78.4	96.06	2.73e-144	54.57	Peroxiredoxin domain, Thioredoxin-like fold
Peroxiredoxin	Ellipsomyxa sp.	903	75.39	85.12	7.13e-61	52.62	Peroxiredoxin domain, Thioredoxin-like fold
Peroxiredoxin	Henneguya salminicola	1713	70.62	92.13	6.46e-120	52.43	Peroxiredoxin domain, Thioredoxin-like fold
Peroxiredoxin	Myxobolus cerebralis	960	69.09	91.42	1.31e-68	47.86	Peroxiredoxin domain, Thioredoxin-like fold
Peroxiredoxin	Myxobolus squamalis	2215	77.99	93.55	1.48e-107	43.5	Peroxiredoxin domain, Thioredoxin-like fold
Peroxiredoxin	Sphaeromyxa zaharoni	1269	71.74	88.17	5.00e-148	48.29	Peroxiredoxin domain, Thioredoxin-like fold
FLYWCH domain protein	Ceratomyxa sp.	1237	78.6	90.65	9.82e-86	52.32	FLYWCH zinc finger domain
FLYWCH domain protein	Ceratonova shasta	1678	74.17	87.54	5.69e-123	46.49	FLYWCH zinc finger domain
FLYWCH domain protein	Ellipsomyxa sp.	1346	77.12	85.57	3.51e-150	49.52	FLYWCH zinc finger domain
FLYWCH domain protein	Henneguya salminicola	1869	78.69	89.81	2.85e-52	56.85	FLYWCH zinc finger domain
FLYWCH domain protein	Myxobolus cerebralis	1296	74.81	92.44	9.26e-149	43.21	FLYWCH zinc finger domain
FLYWCH domain protein	Myxobolus squamalis	1052	73.02	96.06	2.03e-82	44.71	FLYWCH zinc finger domain
FLYWCH domain protein	Sphaeromyxa zaharoni	1365	76.35	92.41	1.92e-60	51.84	FLYWCH zinc finger domain
